# Supplementary material
Source: Springer Nature journal article supplement (https://www.springermedizin.de/resource/supplementary/12981_2011_200_MOESM2_ESM.pdf/9604034)

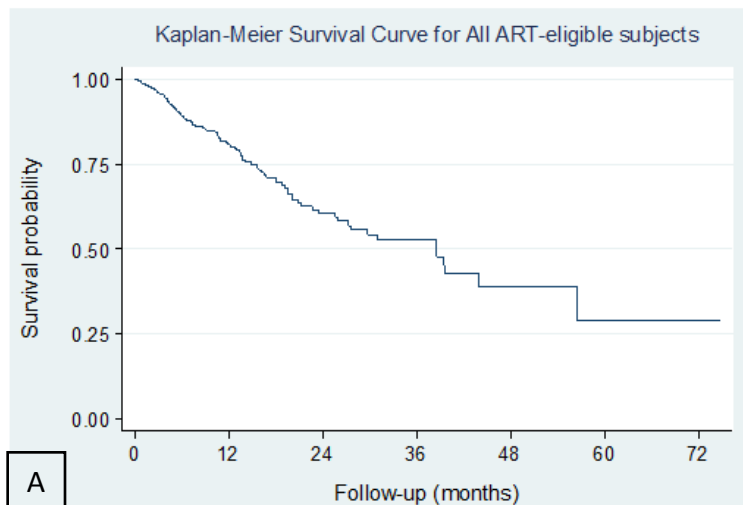

| Number at risk | 790 | 157 | 58 | 25 | 9 | 3 | 2 |
|----------------|-----|-----|----|----|---|---|---|
|----------------|-----|-----|----|----|---|---|---|

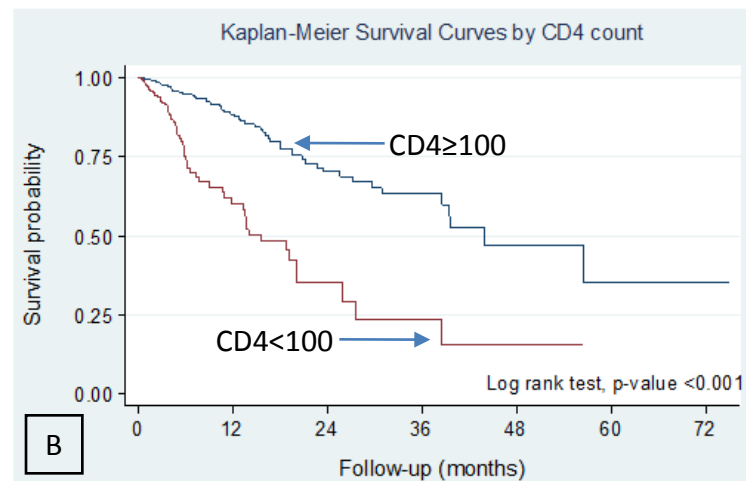

Number at risk

| CD4 ≥ 100 | 530 | 123 | 52 | 22 | 7 | 3 | 2 |
|-----------|-----|-----|----|----|---|---|---|
| CD4 < 100 | 258 | 35  | 7  | 4  | 3 | 1 | 1 |

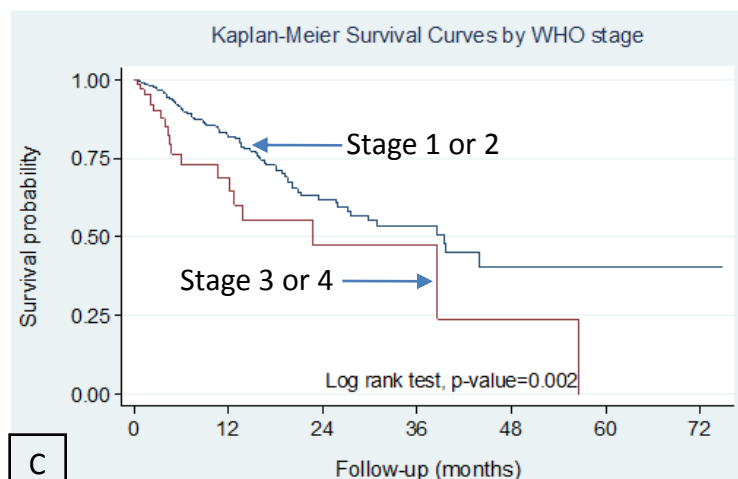

Number at risk

| Stage 1 or 2 | 658 | 141 | 53 | 23 | 8 | 3 | 2 |
|--------------|-----|-----|----|----|---|---|---|
| Stage 3 or 4 | 65  | 17  | 6  | 3  | 2 | 1 | 1 |

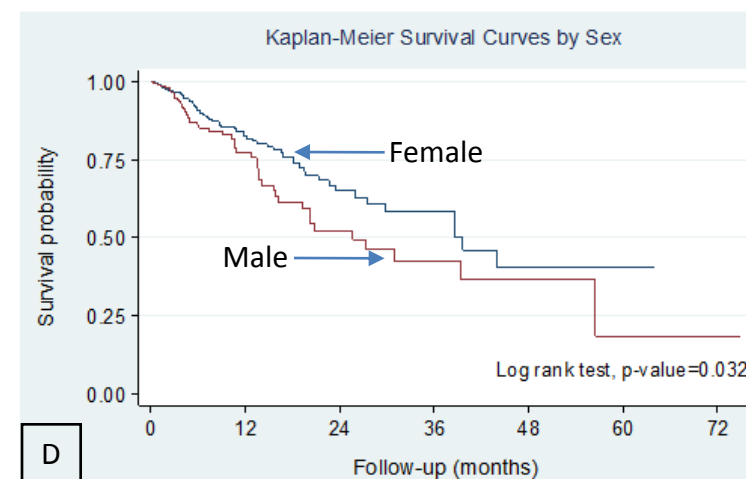

Number at risk

| Female | 539 | 106 | 38 | 17 | 7 | 2 | 1 |
|--------|-----|-----|----|----|---|---|---|
| Male   | 251 | 52  | 21 | 9  | 3 | 2 | 2 |

Supplement: MOESM2 [file 9604034]
